# Supplementary material for: Solid Fuel Exposure and Chronic Obstructive Pulmonary Disease in Never-Smokers
Source: Frontiers journal article supplement (doi:10.3389/fmed.2021.757333), 2021-12-22
Supplement: Data_Sheet_1.PDF [file Data_Sheet_1.PDF]

**Supplementary Table 1.** Severity of COPD according to GOLD grades.

|                                        | Overall (n = 667) |            | Men (n = 236) |            | Women (n = 431) |            |
|----------------------------------------|-------------------|------------|---------------|------------|-----------------|------------|
|                                        | Cases (n)         | Proportion | Cases (n)     | Proportion | Cases (n)       | Proportion |
| GOLD stage I(mild)                     | 273               | 40.9%      | 94            | 39.8%      | 179             | 41.5%      |
| GOLD stage II (moderate)               | 326               | 48.9%      | 105           | 44.5%      | 221             | 51.3%      |
| GOLD stage III-IV (severe-very severe) | 68                | 10.2%      | 37            | 15.7%      | 31              | 7.2%       |

COPD, chronic obstructive pulmonary disease; GOLD, Global Initiative for Chronic Obstructive Pulmonary Disease.

**Supplementary Table 2.** Distributions of typical symptoms in the normal population and COPD patients by GOLD grades.

| Symptoms                           | Status  | Normal<br>n=5604 | GOLD I<br>n=273 | GOLD II<br>n=326 | GOLD III-IV<br>n=68 | Overall<br>COPD<br>n=667 |
|------------------------------------|---------|------------------|-----------------|------------------|---------------------|--------------------------|
| Chronic cough                      | with    | 451(8.05)        | 34(12.45)       | 38(11.66)        | 10(14.71)           | 82(12.29)                |
|                                    | without | 5079(90.63)      | 237(86.81)      | 287(88.04)       | 58(85.29)           | 582(87.26)               |
| Chronic phlegm                     | with    | 373(6.66)        | 31(11.36)       | 31(9.51)         | 12(17.65)           | 74(11.09)                |
|                                    | without | 5155(91.99)      | 240(87.91)      | 294(90.18)       | 56(82.35)           | 590(88.46)               |
| Recurrent wheezing                 | with    | 211(3.77)        | 15(5.49)        | 22(6.75)         | 8(11.76)            | 45(6.75)                 |
|                                    | without | 5316(94.86)      | 256(93.77)      | 303(92.94)       | 60(88.24)           | 619(92.80)               |
| Dyspnea in daily life              | with    | 1078(19.24)      | 89(32.60)       | 68(20.86)        | 20(29.41)           | 177(26.54)               |
|                                    | without | 4453(79.46)      | 182(66.67)      | 275(84.36)       | 48(70.59)           | 487(73.01)               |
| At least one of the above symptoms | with    | 1456(25.98)      | 112(41.03)      | 93(28.53)        | 25(36.76)           | 230(34.48)               |
|                                    | without | 4148(74.02)      | 161(58.97)      | 233(71.47)       | 43(63.24)           | 437(65.52)               |

COPD, chronic obstructive pulmonary disease; GOLD, Global Initiative for Chronic Obstructive Pulmonary Disease.

**Supplementary Figure 1.** Flow of participants through the study.

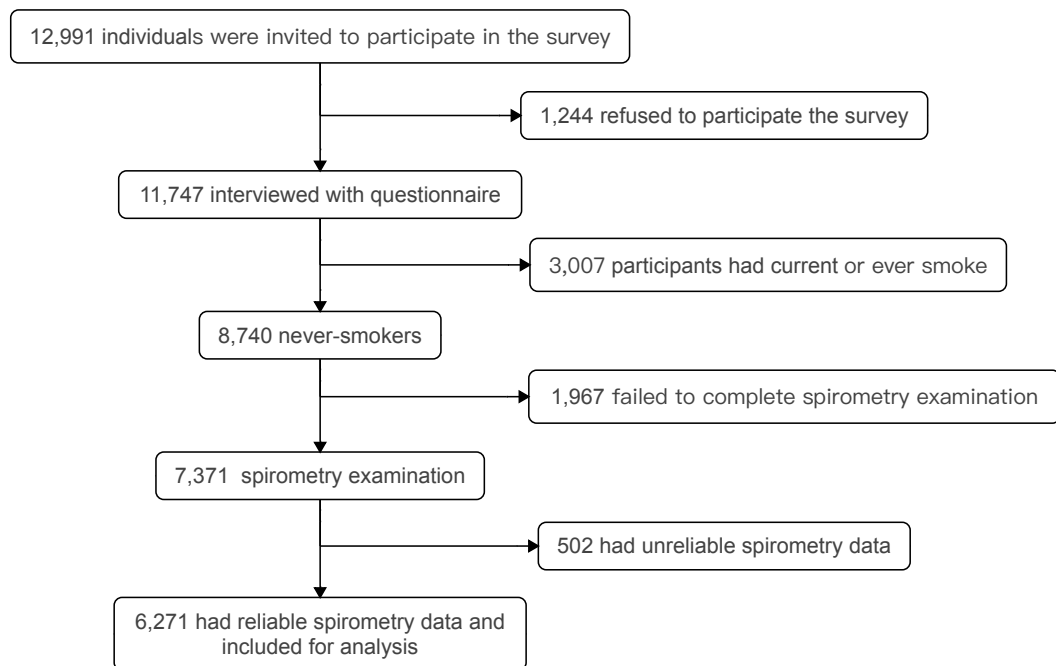

**Supplementary Figure 2.** Prevalence and corresponding 95%CI of COPD by age-stratified.

a) overall; b) men; c) women

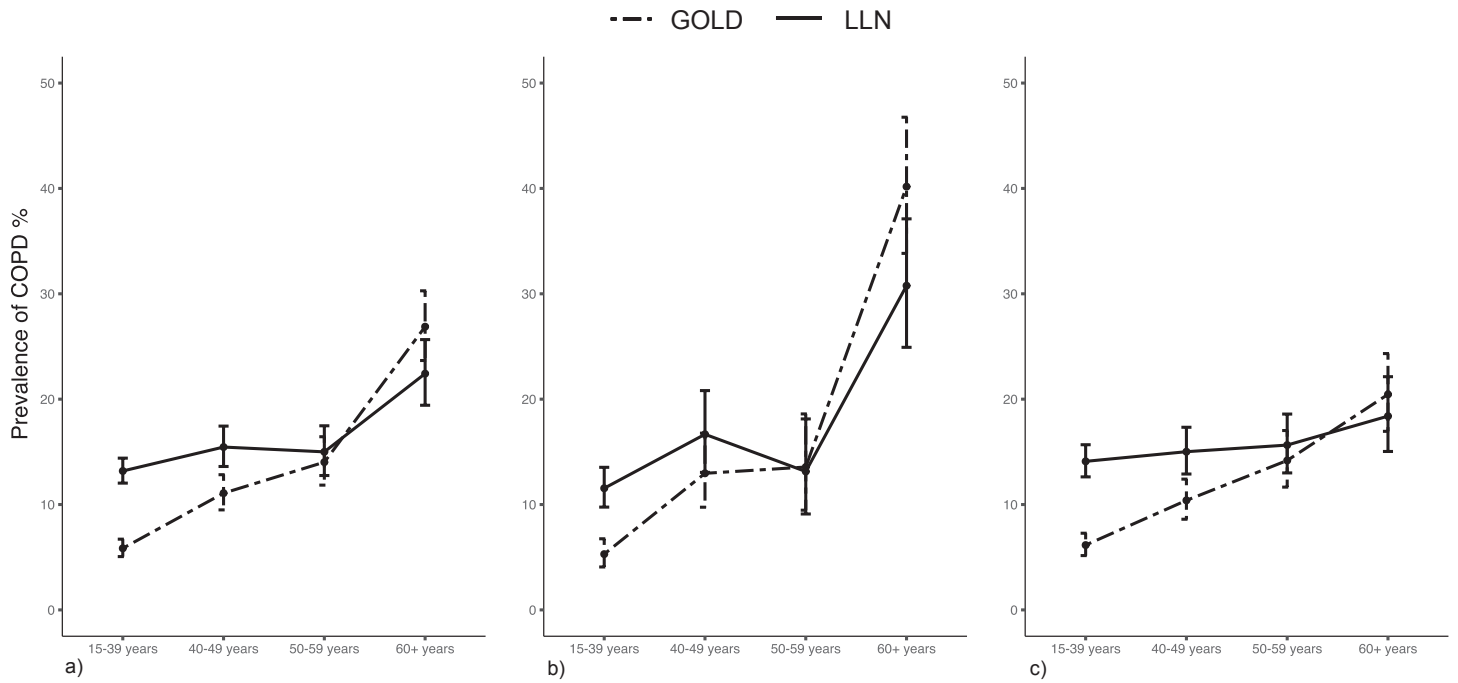

COPD, chronic obstructive pulmonary disease; CI, confidence interval. Bars represent the prevalence and error bars the 95%CI.
